# Supplementary material
Source: publisher site journal article supplement (https://www.spandidos-publications.com/4362/downloadSupplementary)

Figure S1. GO gene function annotation on BP. The full version of Fig. 2: section ‘BP’ is demonstrated. GO, Gene Ontology; BP, biological process.

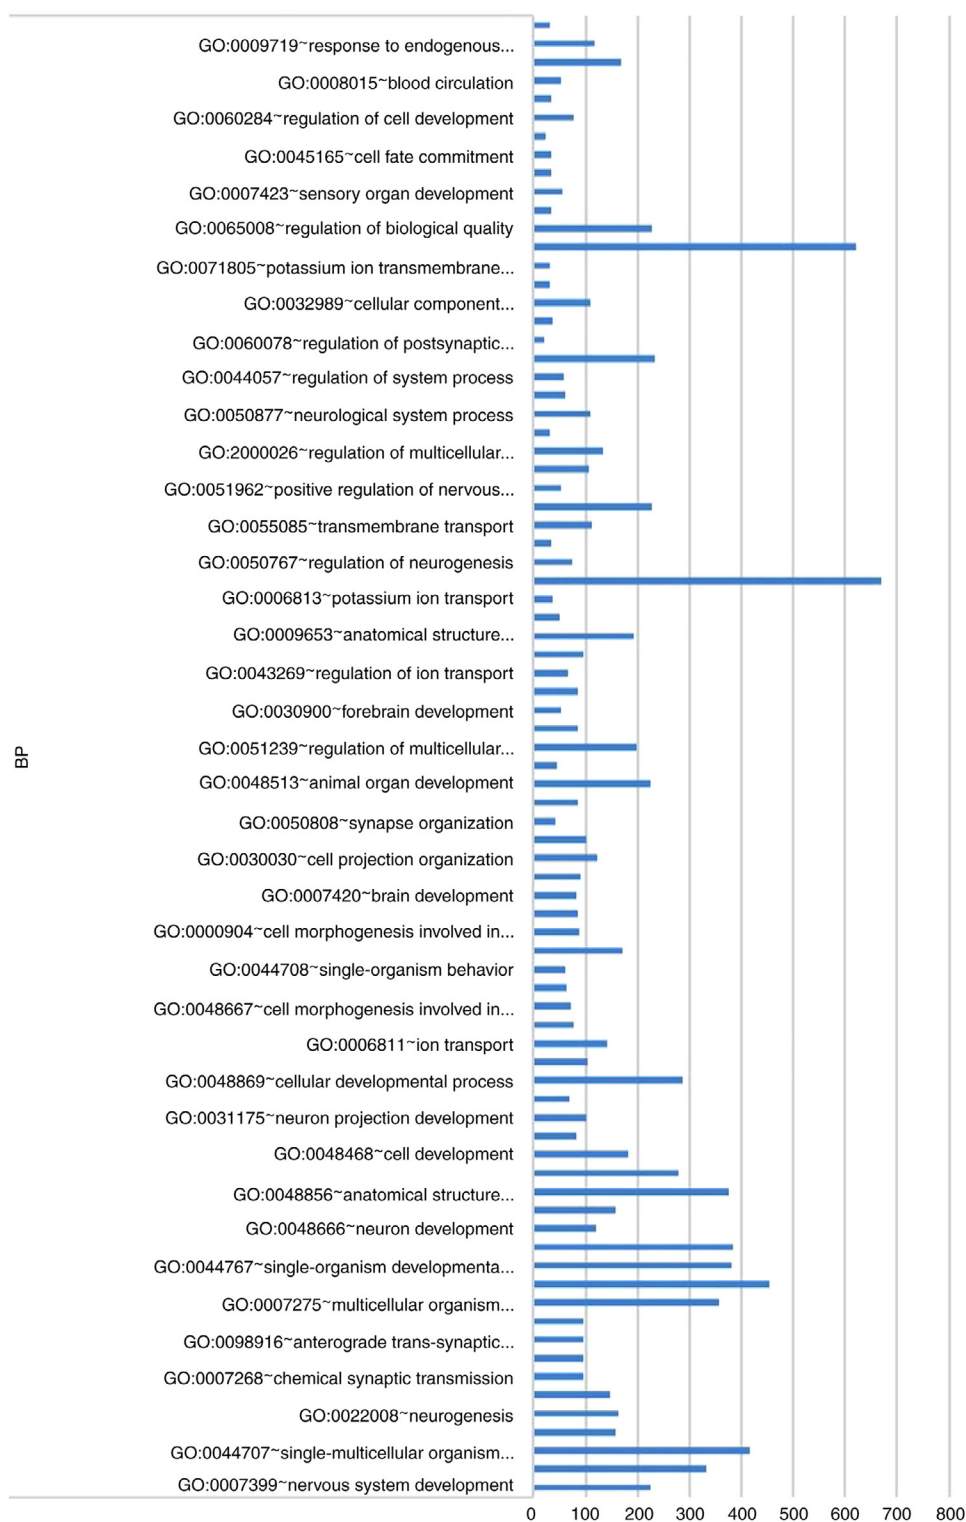

Figure S2. GO gene function annotation on CC. The full version of Fig. 2: section 'CC' is presented. GO, Gene Ontology; CC, cellular component.

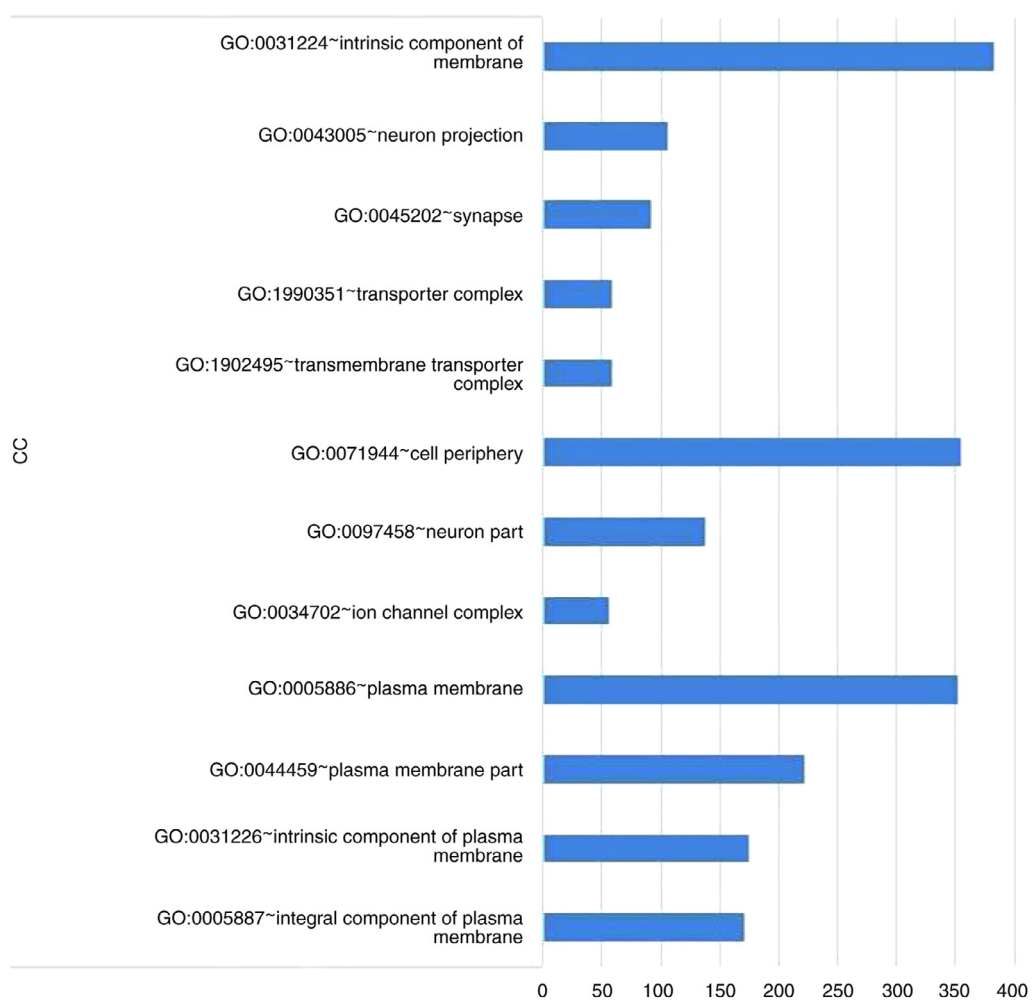

Figure S3. GO gene function annotation on molecular function. The full version of Fig. 2: section ‘MF’ is demonstrated. GO, Gene Ontology; MF, molecular function.

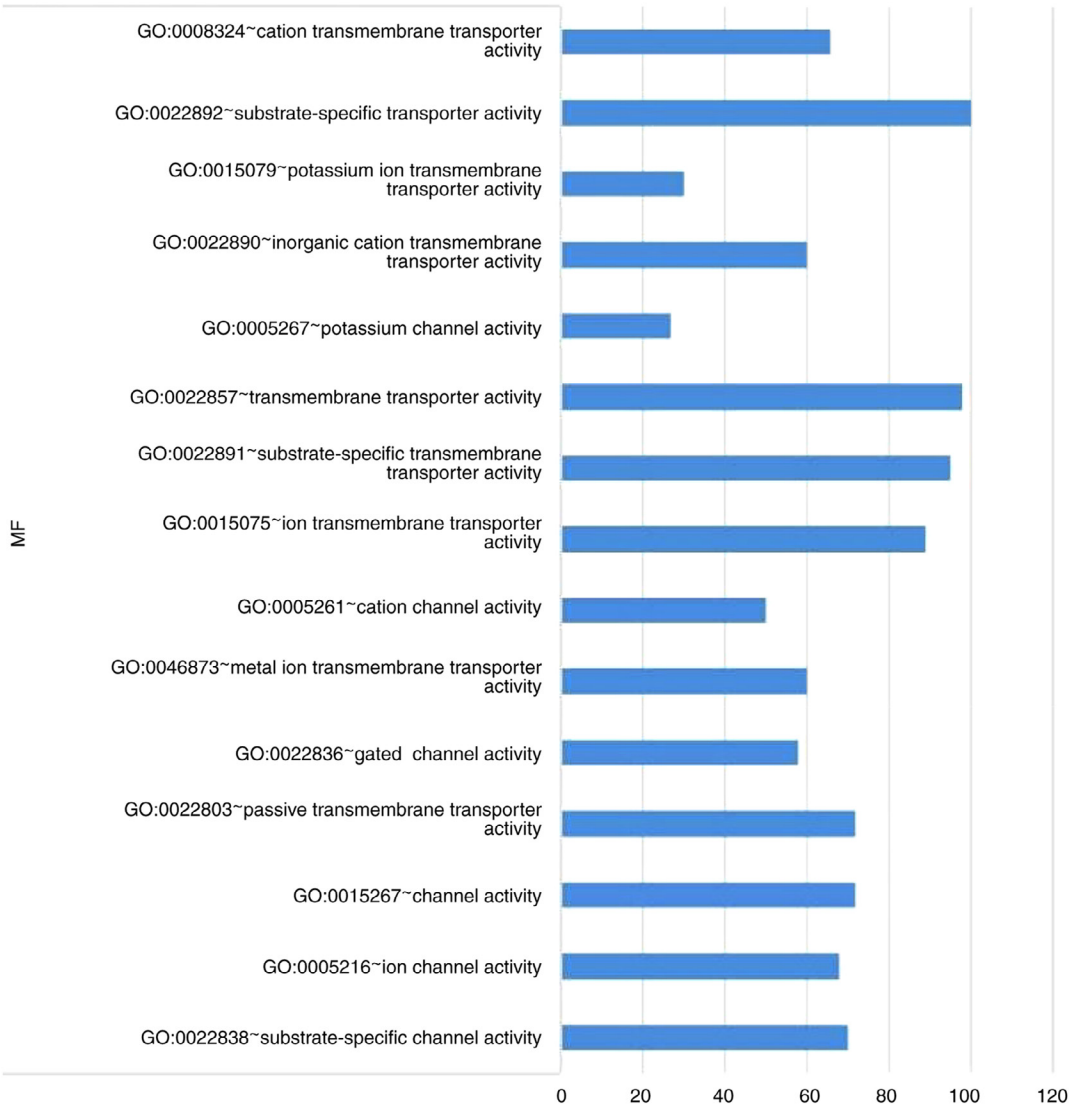

Figure S4. KEGG pathway enrichment. KEGG is the abbreviation of KEGG pathways. The full version of Fig. 2: section 'KEGG' is presented. KEGG, Kyoto Encyclopedia of Genes and Genomes.

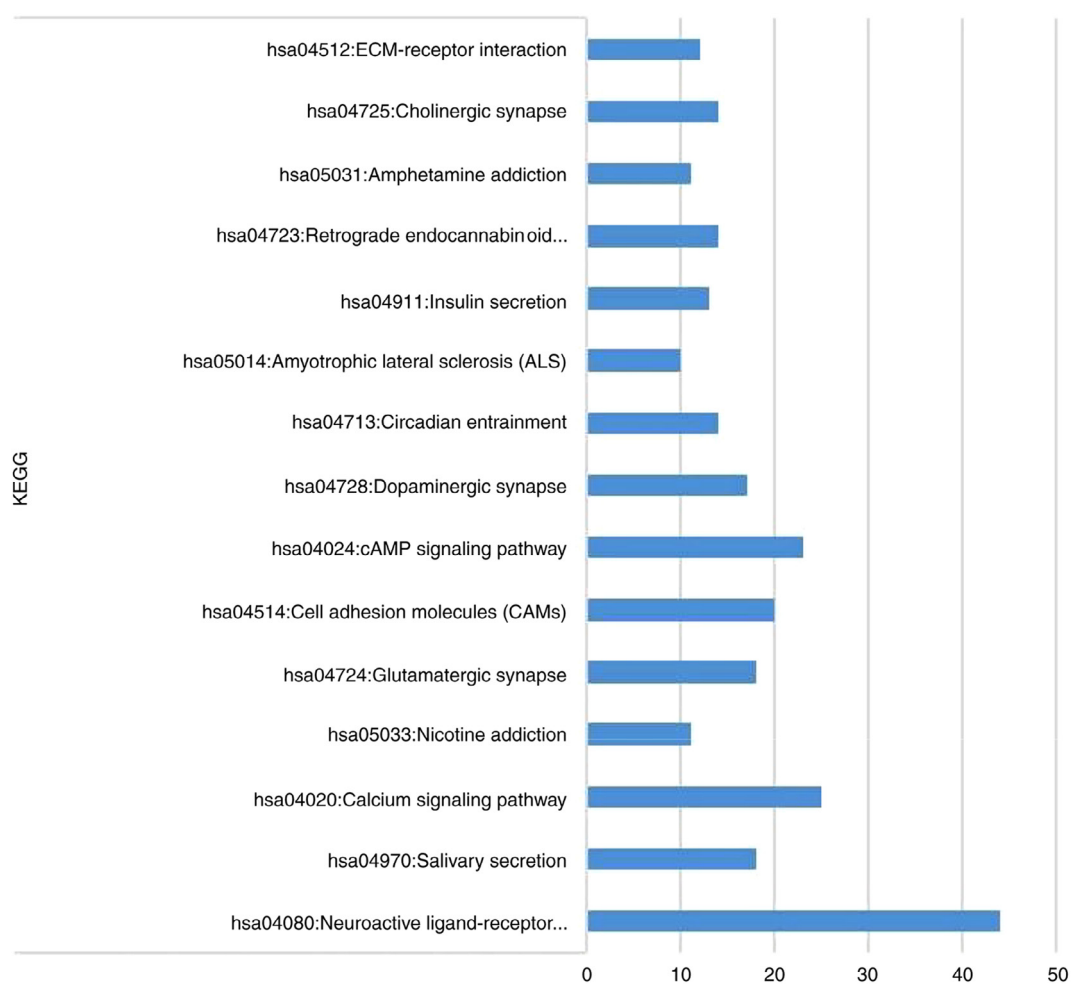

Figure S5. Scatter plot of methylation level of ADCY5 in combination group, T2DM group and CRC group. The T2DM group is on the x-axis (the horizontal axis on left side), the combination group (CRC with T2DM) is on the y-axis (vertical axis), and the CRC group is on the z-axis (the horizontal axis on right side). Spearman's correlation analysis was used and 'r' represents the correlation coefficient between the two groups. The results showed that the correlation coefficient between the combination group and the T2DM group was higher than that between the combination group and the CRC group. ADCY5, adenylate cyclase 5; T2DM, type 2 diabetes mellitus; CRC, colorectal cancer.

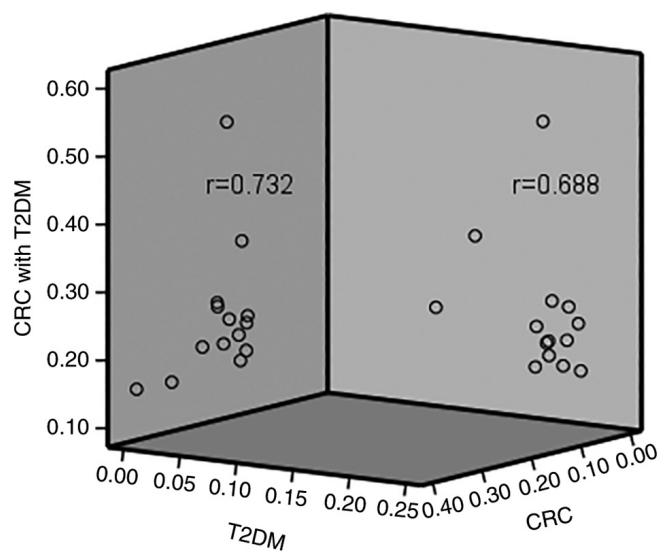

Supplement: Supplementary file 1 [file downloadSupplementary]
